# Supplementary material for: H3K36 methyltransferase NSD1 regulates chondrocyte differentiation for skeletal development and fracture repair
Source: PubMed Central journal article supplement (PMC8185073; doi:10.1038/s41413-021-00148-y), 2021-06-07

**Fig. S1**

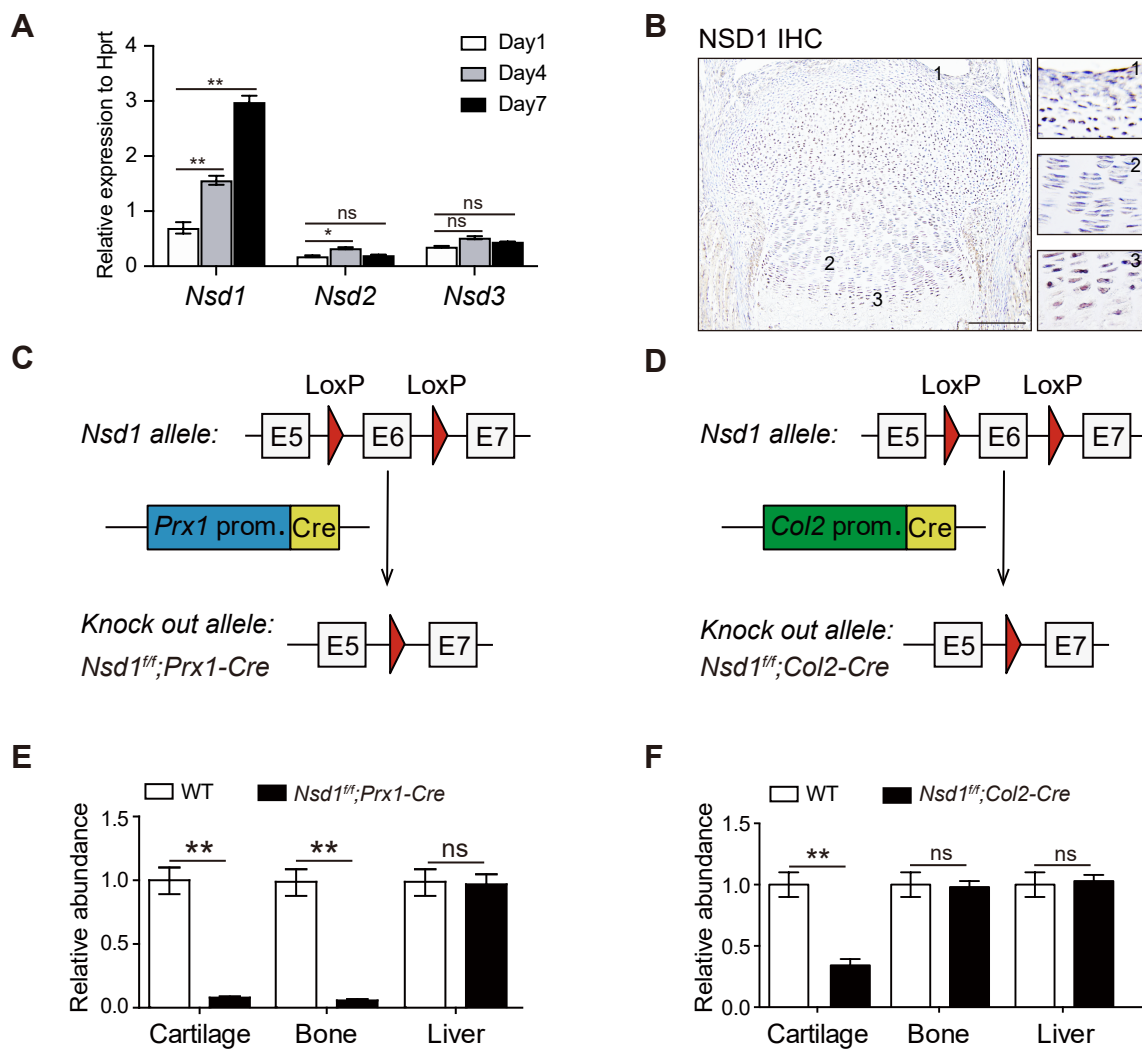

Fig. S2

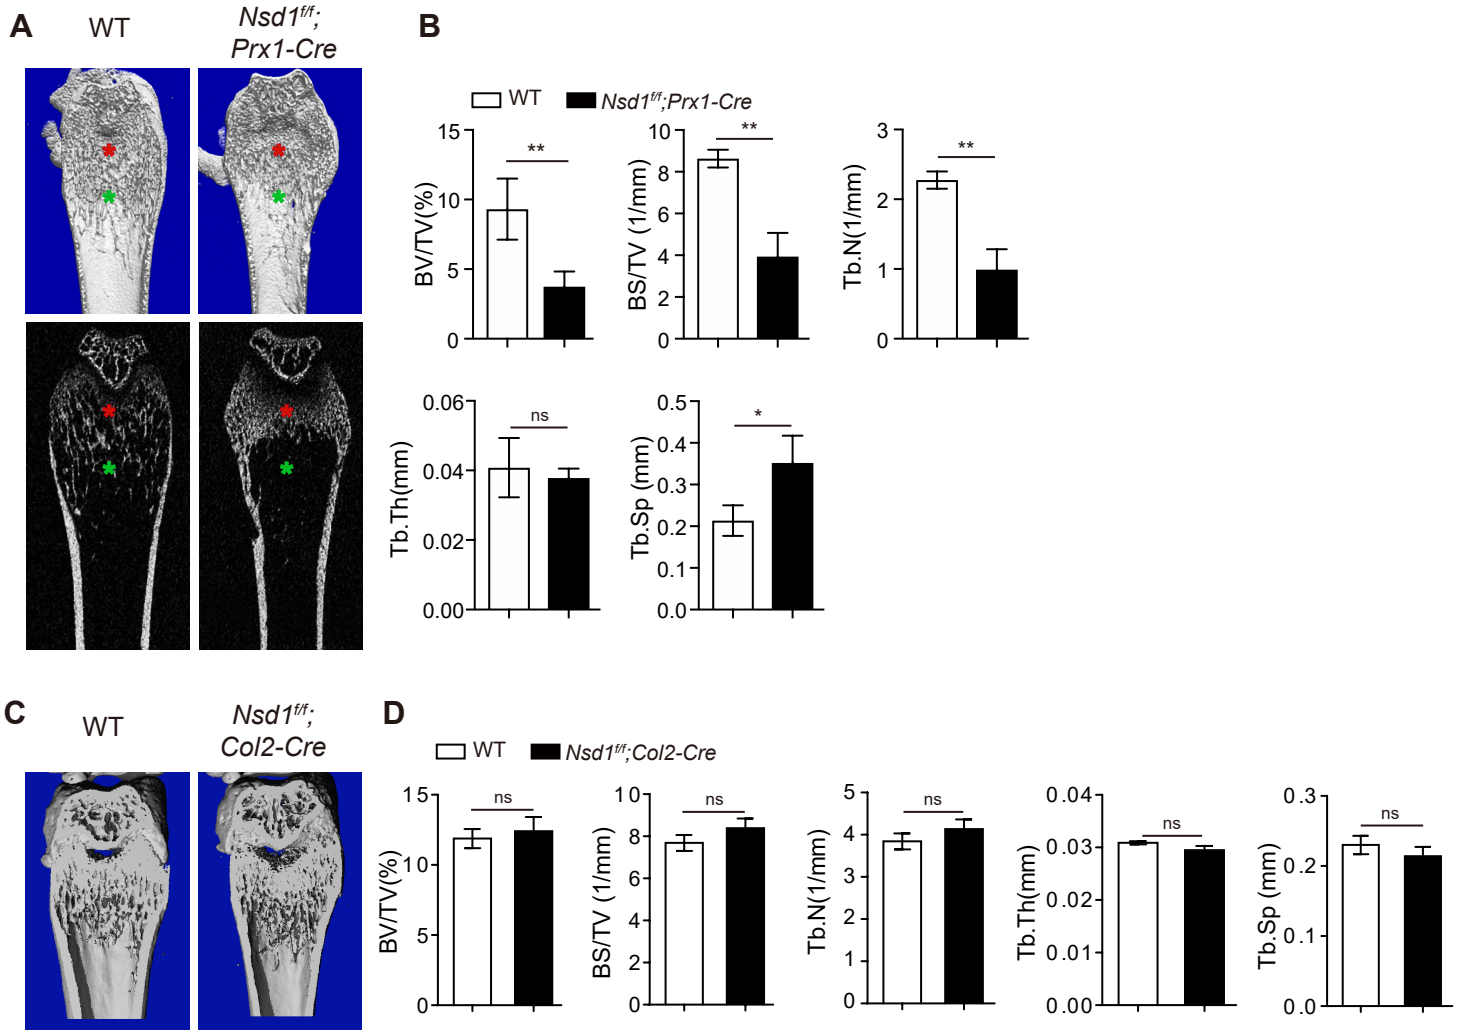

**Fig. S3**

**A**

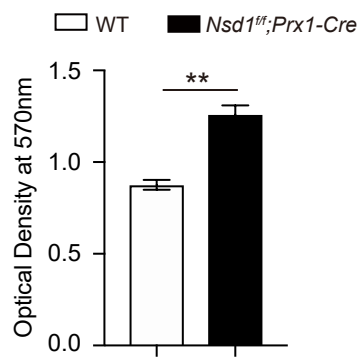

**B**

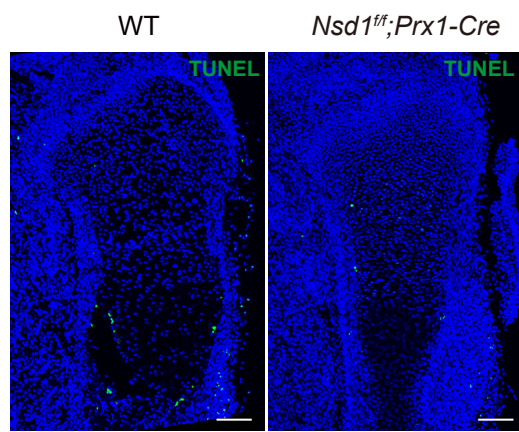

**Fig. S4**

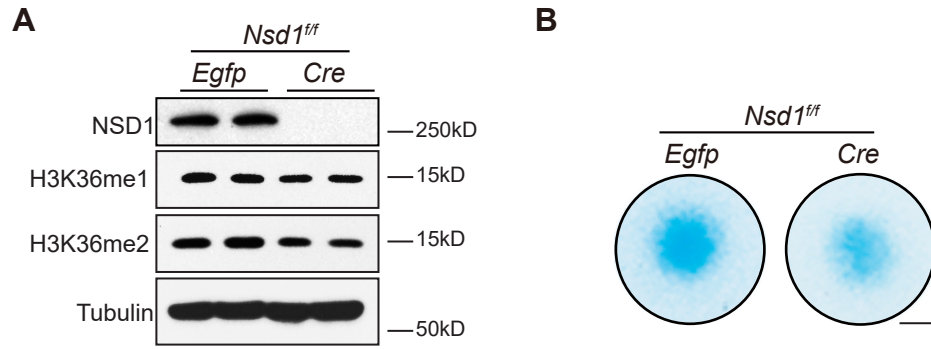

**Fig. S5**

**A**

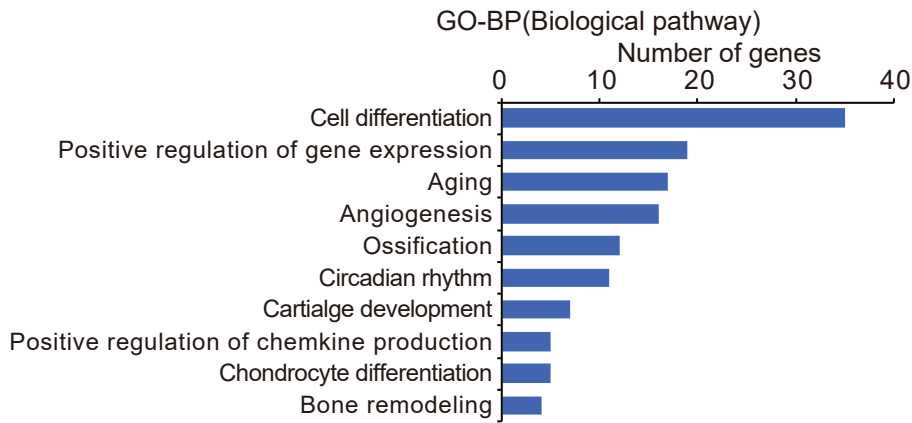

**B**

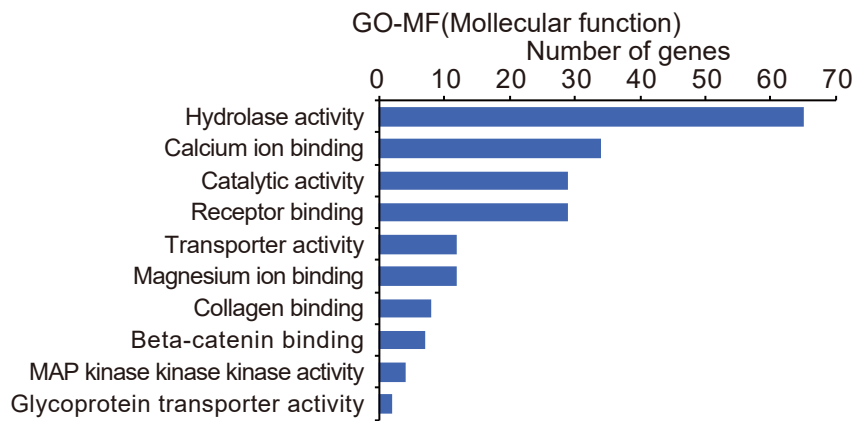

**C**

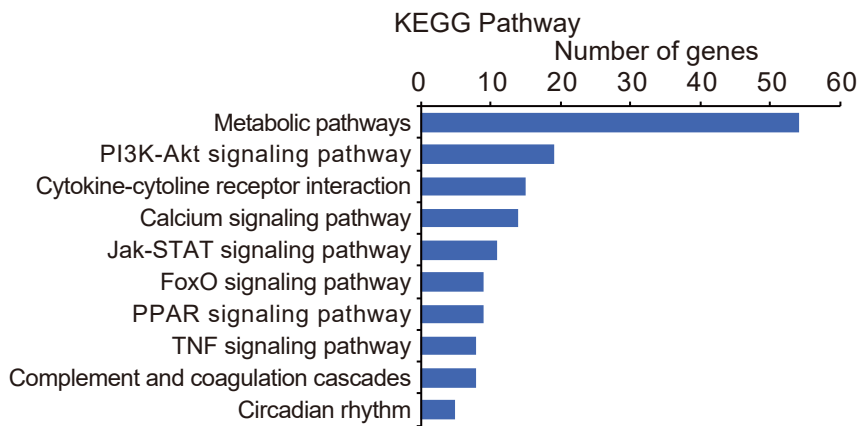

Fig. S6

A

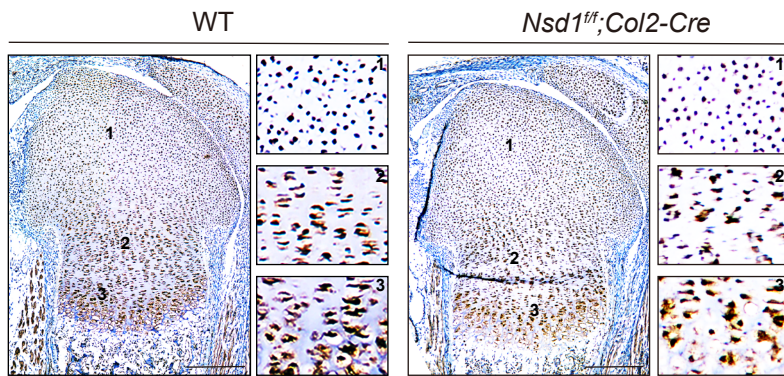

Fig. S7

A

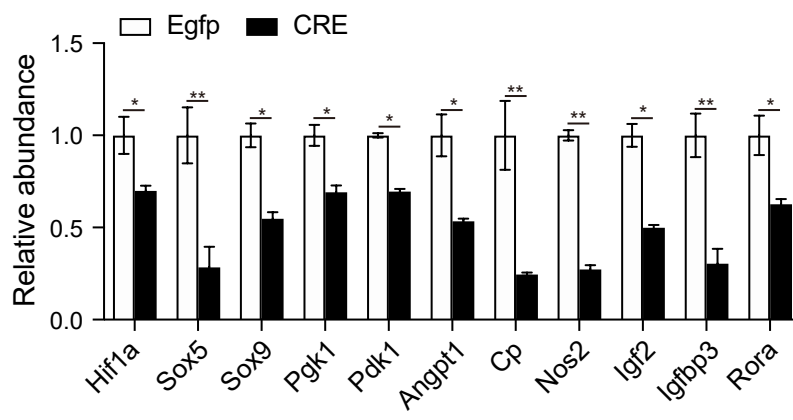

Fig. S8

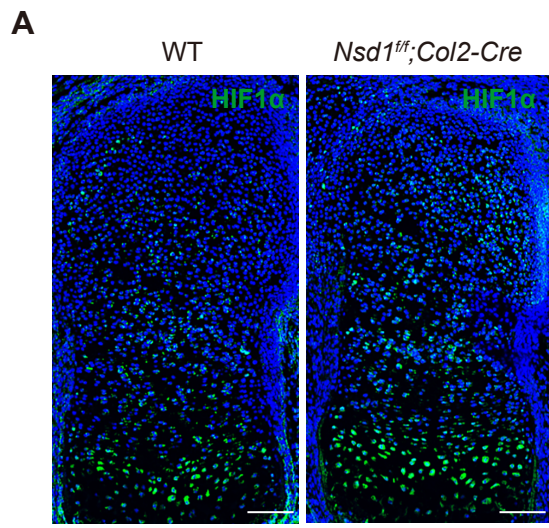



Fig. S9

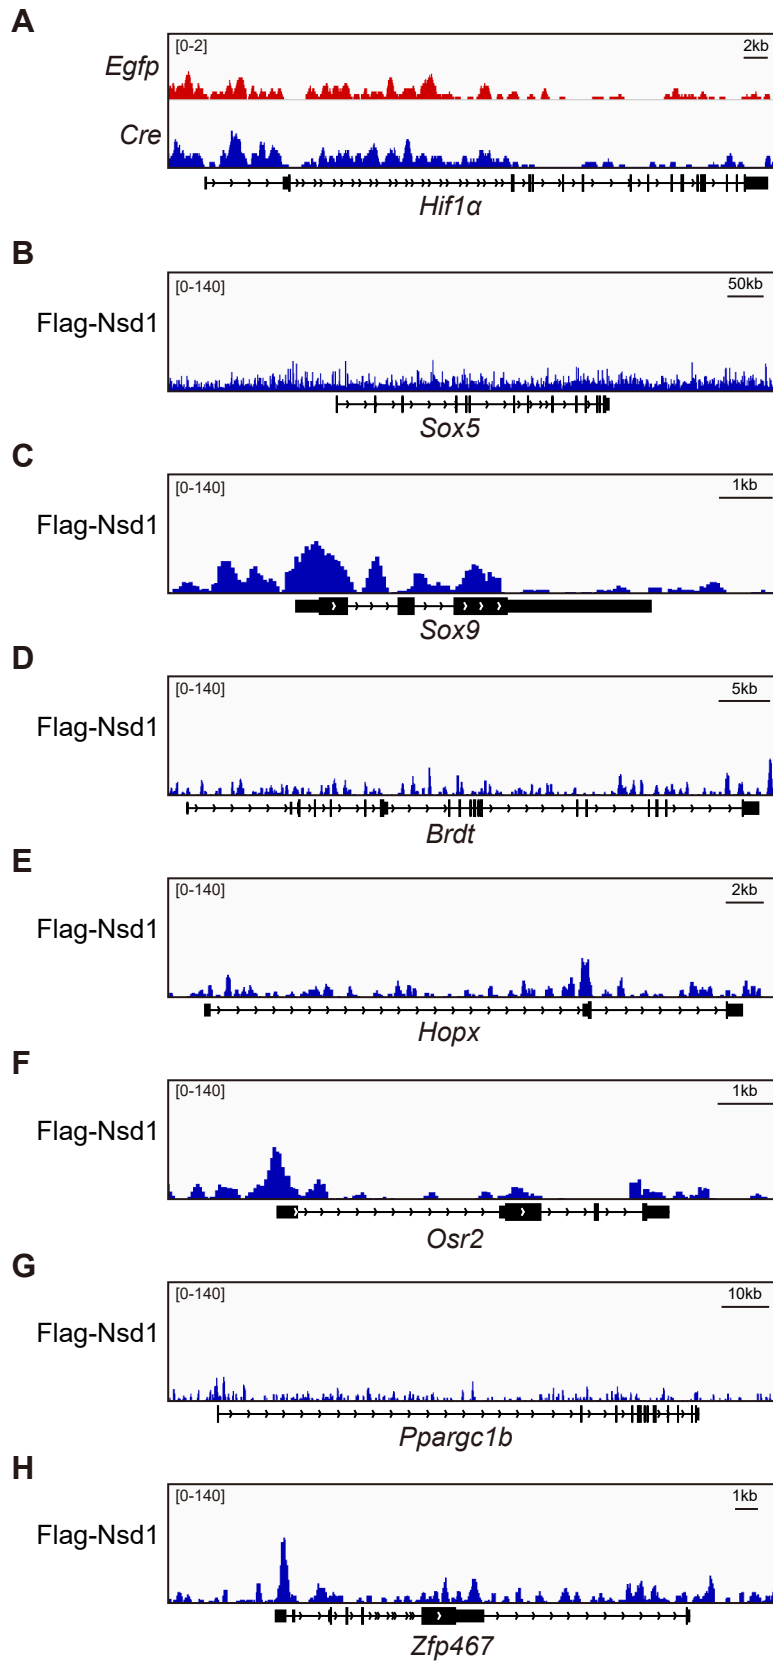

Fig. S10

A

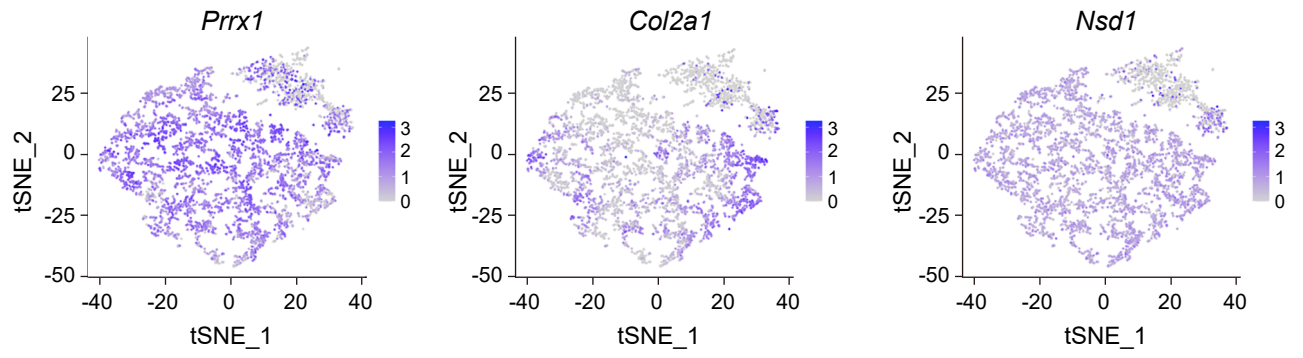

Supplement: 41413_2021_148_MOESM2_ESM.pdf [file 41413_2021_148_MOESM2_ESM.pdf]
